# Supplementary material for: Association of breastfeeding and three-dimensional dental arch relationships in primary dentition
Source: Springer Nature journal article supplement (doi:10.1186/s12903-015-0010-1), 2015-03-09
Supplement: MOESM1 [file 9754064]

Case Number: \_\_\_\_\_

## Oral Health Related Habits Questionnaire:

Name of Child: \_\_\_\_\_

Gender:  Male  Female

School's name: \_\_\_\_\_

Parent's contact number: \_\_\_\_\_

### 1. Background information:

1.1 Child's birthday: \_\_\_\_\_ Year \_\_\_\_ Month \_\_\_\_ Day

1.2 Child's place of birth:  Hong Kong  Mainland, China  
 Others, Please specify: \_\_\_\_\_

1.3 Number of years living in Hong Kong: \_\_\_\_\_ Year(s)

1.4 Does your child have the following medical conditions?

(Can choose more than one)

Congenital heart disease/ Rheumatic heart disease/ Other heart disease

Thalassemia/Hemophilia/ Other blood disease

Asthma/ Long term respiratory disease

Epilepsy

Long term use of medications, please specify: \_\_\_\_\_

Past surgical history, please specify: \_\_\_\_\_

Other important medical history, please specify : \_\_\_\_\_

### 2. Para functional and feeding habits:

2.1 Has your child ever gotten a habit of thumb/digit sucking **ever since birth till now**?

Very often (Nearly every day)  Often (A few times a week)

Sometimes (A few times a month)  Not often  Never  Do not know

If with this habit, which finger does your child suck on?

Thumb  Second finger  Others(Please specify: \_\_\_\_\_)

(If answered "Never" or "Do not know" in question 2.1, please skip to question 2.4)

2.2 When did your child's thumb/digit sucking habit **start**?

0 to 6 months  6 months to 1 years old  1 to 2 years old

2 to 3 years old  3 to 4 years old  4 to 5 years old

5 to 6 years old  Do not know

2.3 When did your child's thumb/digit sucking habit **stop**?

0 to 6 months  6 months to 1 years old  1 to 2 years old

2 to 3 years old  3 to 4 years old  4 to 5 years old

5 to 6 years old  Still have this habit  Do not know

2.4 Has your child ever gotten a habit of using a pacifier **ever since birth till now**?

- Very often (Nearly every day)       Often (A few times a week)  
 Sometimes (A few times a month)     Not often     Never       Do not know

(If answered "Never" or "Do not know" in question 2.4, please skip to question 2.8)

2.5 **On average**, how long does your child use the pacifier?

(Please specify: \_\_\_\_\_ hours a day)

2.6 When did your child's use of pacifier habit **start**?

- 0 to 6 months       6 months to 1 years old       1 to 2 years old  
 2 to 3 years old     3 to 4 years old               4 to 5 years old  
 5 to 6 years old       Do not know

2.7 When did your child's use of pacifier habit **stop**?

- 0 to 6 months       6 months to 1 years old       1 to 2 years old  
 2 to 3 years old     3 to 4 years old               4 to 5 years old  
 5 to 6 years old     Still have this habit       Do not know

2.8 Was your child **breastfed**?

- Yes, entirely breastfed       Yes, partly breastfed and partly with powdered milk       No

2.9 How long was your child **entirely breastfed** for?

- Less than 1 month       1 to 3 months       3 to 6 months       6 to 9 months  
 9 to 12 months       More than 12 months  
 Others: (Please specify: \_\_\_\_\_)

### 3 Family background:

3.1 Your child is under a:

- Single parent household       Two parent household  
 Others(Please specify: \_\_\_\_\_)

3.2 Monthly **total** family income:

- HK \$ 10,000 or below       HK \$ 10,001 -15,000  
 HK \$ 15,001 -20,000       HK \$ 20,001 -25,000  
 HK \$ 25,001 -30,000       HK \$ 30,001 -35,000  
 HK \$ 35,001 or above

3.3 Parent's education level:

Father

- Elementary school or below  
 Secondary school  
 Tertiary education/Collage or above

Mother

- Elementary school or below
- Secondary school
- Tertiary education/Collage or above

6.4 Who **usually** take care of your child? (Please choose one)

- Parents       Grandparents       Domestic helper
- Others (E.g. Relatives or friends) Please specify: \_\_\_\_\_

**End of the questionnaire**  
**Thank you for your participation!**
